# Supplementary material for: The Mechanistic Basis of Myxococcus xanthus Rippling Behavior and Its Physiological Role during Predation
Source: PubMed Central journal article supplement (PMC3459850; doi:10.1371/journal.pcbi.1002715), 2012-09-27

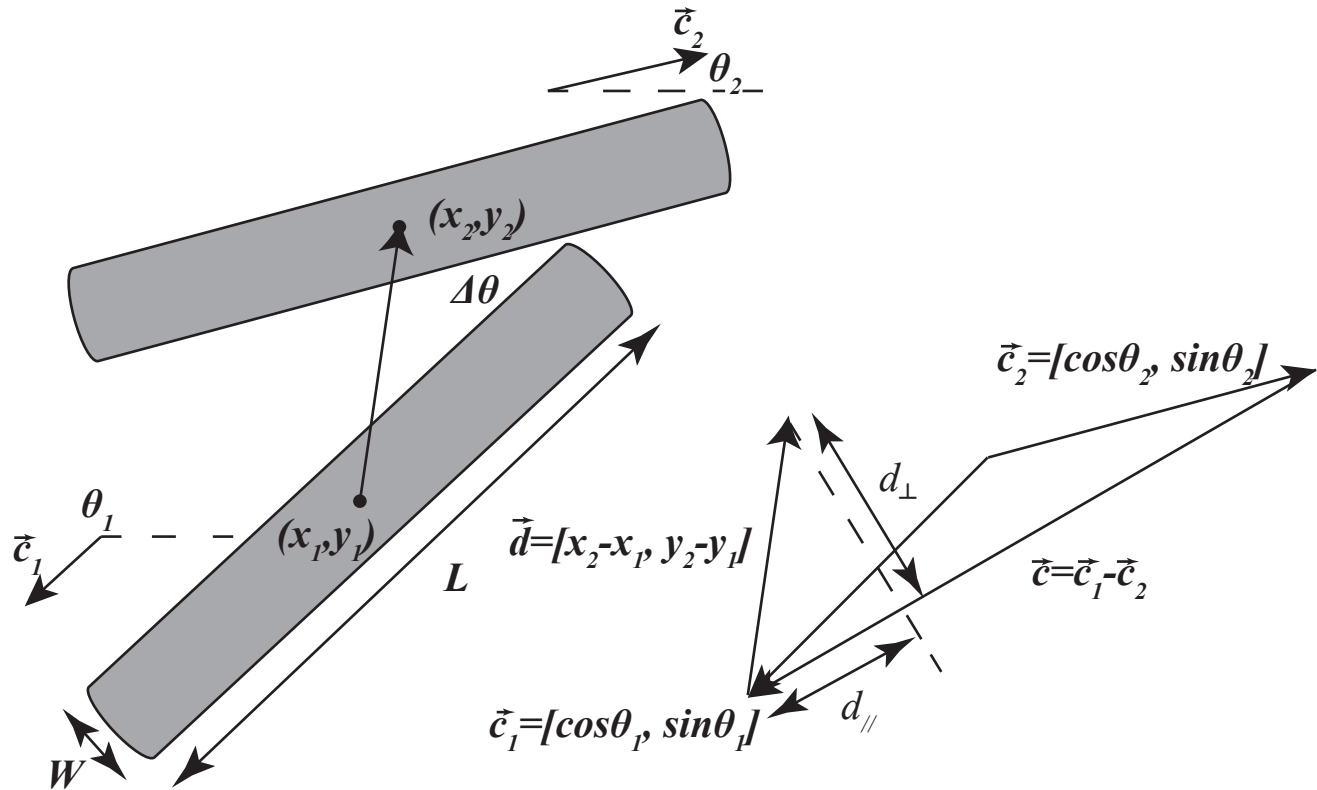

Supplement: pcbi.1002715.s001.pdf [file pcbi.1002715.s001.pdf]
