# Supplementary material for: The Mechanistic Basis of Myxococcus xanthus Rippling Behavior and Its Physiological Role during Predation
Source: PubMed Central journal article supplement (PMC3459850; doi:10.1371/journal.pcbi.1002715), 2012-09-27
Supplement: pcbi.1002715.s004.pdf [file pcbi.1002715.s004.pdf]

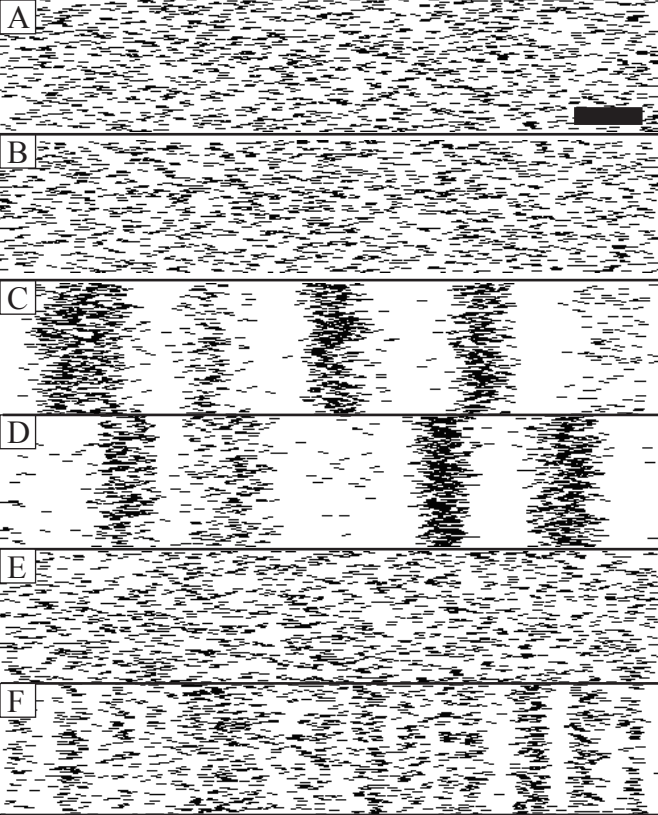

A

B

C

D

E

F
