# Supplementary material for: The Mechanistic Basis of Myxococcus xanthus Rippling Behavior and Its Physiological Role during Predation
Source: PubMed Central journal article supplement (PMC3459850; doi:10.1371/journal.pcbi.1002715), 2012-09-27
Supplement: pcbi.1002715.s009.pdf [file pcbi.1002715.s009.pdf]

**Table S1 Parameters used in simulations**

| Variable name    | Description                                      | Value                           | Source                                                                                                              |
|------------------|--------------------------------------------------|---------------------------------|---------------------------------------------------------------------------------------------------------------------|
| $\rho$           | Cell density                                     | $0.3 / \mu\text{m}^2$           | The cell density is corresponding to one layer of densely packed cells                                              |
| $\delta t$       | Simulation time-step                             | 5 s                             |                                                                                                                     |
| $w$              | Cell width                                       | $0.5 \mu\text{m}$               | From observation of individual cells                                                                                |
| $L$              | Cell length                                      | $7 \mu\text{m}$                 | From observation of individual cells                                                                                |
| $v$              | Agent velocity                                   | $6 \mu\text{m}/\text{min}$      | Average cell velocity observed in experiments                                                                       |
| $D$              | Spatial diffusion coefficient                    | $0.1 \mu\text{m}^2/\text{s}$    | Obtained by matching instant cell velocity distributions in ABM simulations and experimental data analysis          |
| $T$              | Natural reversal period of agents                | 8 min                           | Average cell reversal period observed in experiments of non-rippling cells                                          |
| $D_\varphi$      | Phase diffusion coefficient                      | $10^{-4} \text{rad}^2/\text{s}$ | Obtained by matching reversal period distributions in ABM simulations and experimental data analysis                |
| $T_0$            | Refractory time                                  | 2.6 min                         | Obtained by matching the average reversal period in ABM simulations and experimental observations of ripping cells. |
| $\Delta\theta_0$ | Angle difference threshold for contact detection | $0.0833\pi$                     |                                                                                                                     |
| $\tau_\theta$    | Angular correlation time                         | 50 s                            | Adapted from the work of Sliusarenko et al.[19]                                                                     |
| $D_\theta$       | Angle diffusion coefficient                      | $10^{-4} \text{rad}^2/\text{s}$ | Adapted from the work of Sliusarenko et al. [19]                                                                    |
| $p_0$            | Signal probability per time-step (“on prey”)     | 0.1                             | Toned to match the experimental observed pattern                                                                    |
| $p_0$            | Signal probability per time-step (“off prey”)    | 0.03                            | Chosen below the ripple-inducing threshold (Figure S3)                                                              |
