# Supplementary material for: The Mechanistic Basis of Myxococcus xanthus Rippling Behavior and Its Physiological Role during Predation
Source: PubMed Central journal article supplement (PMC3459850; doi:10.1371/journal.pcbi.1002715), 2012-09-27
Supplement: pcbi.1002715.s011.pdf [file pcbi.1002715.s011.pdf]

Table S3: Motility parameters for cells tracked on and off prey

| Experimental observations | Cell speed                           | Reversal period             |
|---------------------------|--------------------------------------|-----------------------------|
| On prey (rippling)        | $6.0 \pm 1.5 \mu\text{m}/\text{min}$ | $6.6 \pm 2.4 \text{ min}$   |
| Off prey (no rippling)    | $6.1 \pm 1.7 \mu\text{m}/\text{min}$ | $8.4 \pm 7.5 \text{ min}^*$ |

\* Part of the variability is associated with technical difficulties in automatic reversal detection in non-aligned population.
