# Supplementary material for: The Mechanistic Basis of Myxococcus xanthus Rippling Behavior and Its Physiological Role during Predation
Source: PLOS journal article supplement (doi:10.1371/journal.pcbi.1002715), 2012-09-27
Supplement: S2 (10.1371/journal.pcbi.1002715.s002) [file journal.pcbi.1002715.s002]

Side-to-side signaling

Head-to-head signaling

$D_x \sim 10^{-6}$

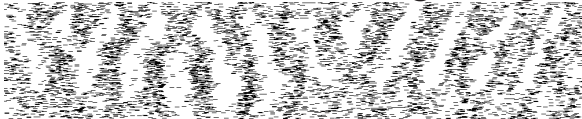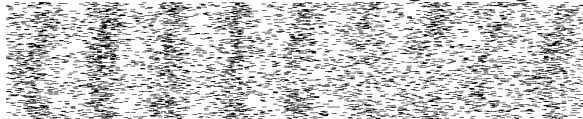

$D_x \sim 10^{-1}$

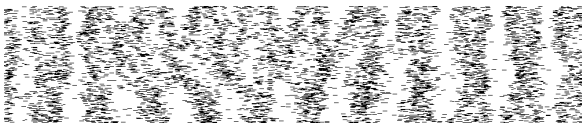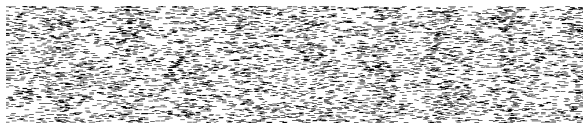

Signal probability = 0.1

Signal probability = 1
