# Supplementary material for: The Mechanistic Basis of Myxococcus xanthus Rippling Behavior and Its Physiological Role during Predation
Source: PLOS journal article supplement (doi:10.1371/journal.pcbi.1002715), 2012-09-27
Supplement: S10 (10.1371/journal.pcbi.1002715.s010) [file journal.pcbi.1002715.s010]

**Table S2:** Experimental data on individual cell motility parameters and resulted wavelengths is consistent with the Eq.(2)

| Data source                         | Cell speed                           | Reversal period           | Wave-crest width       | Predicted wavelength | Measured wavelength     |
|-------------------------------------|--------------------------------------|---------------------------|------------------------|----------------------|-------------------------|
| Our measurements (main text figure) | $6.0 \pm 1.5 \mu\text{m}/\text{min}$ | $6.6 \pm 2.4 \text{ min}$ | $10 \pm 5 \mu\text{m}$ | $99.2 \mu\text{m}$   | $82 \pm 15 \mu\text{m}$ |
| Our measurements <sup>1</sup>       | $2.9 \pm 1.7 \text{ m}/\text{min}$   | $6.0 \pm 6.0 \text{ min}$ | $5 \pm 2 \mu\text{m}$  | $44.8 \mu\text{m}$   | $40 \pm 12 \mu\text{m}$ |
| Our measurements <sup>1</sup>       | $3.0 \pm 1.7 \mu\text{m}/\text{min}$ | $4.5 \pm 4.3 \text{ min}$ | $2 \pm 3 \mu\text{m}$  | $31.0 \mu\text{m}$   | $28 \pm 4 \mu\text{m}$  |
| Ref. [13] <sup>2</sup>              | $\sim 3.0 \mu\text{m}/\text{min}$    | $\sim 8.0 \text{ min}$    | $\sim 10 \mu\text{m}$  | $68.0 \mu\text{m}$   | $\sim 70 \mu\text{m}$   |

<sup>1</sup> We selected two movies displaying different wavelength for detailed analysis and tracking. Variations in cell speed and reversal period are due to differences in agar and prey density.

<sup>2</sup> Data on extracted from Figures and text of Ref. [13].
