# Supplementary material for: The Mechanistic Basis of Myxococcus xanthus Rippling Behavior and Its Physiological Role during Predation
Source: PLOS journal article supplement (doi:10.1371/journal.pcbi.1002715), 2012-09-27
Supplement: S12 (10.1371/journal.pcbi.1002715.s012) [file journal.pcbi.1002715.s012]

301 Moved Permanently

# Moved Permanently

The document has moved here.

---

Apache Server at www.ploscompbiol.org Port 80
